# Supplementary material for: Spherical nanoporous LiCoPO4/C composites as high performance cathode materials for rechargeable lithium-ion batteries
Source: Royal Society of Chemistry journal article supplement (doi:10.1039/c1jm10793c), 2011-01-01
Supplement: c1jm10793c.pdf [file c1jm10793c.pdf]

## Electronic Supplementary Information

# Spherical Nanoporous $\text{LiCoPO}_4/\text{C}$ Composites as High Performance Cathode Materials for Rechargeable Lithium-Ion Batteries

Jun Liu,<sup>§,a</sup> Thomas E. Conry,<sup>§,a</sup> Xiangyun Song,<sup>a</sup> Li Yang,<sup>a</sup> Marca M. Doeff,<sup>\*,a</sup> and Thomas J. Richardson<sup>\*,a</sup>

Received (in XXX, XXX) Xth XXXXXXXXX 20XX, Accepted Xth XXXXXXXXX 20XX

DOI: 10.1039/b000000x

### Experimental

X-ray powder diffraction (XRD) patterns were obtained using a Phillips X'Pert X-ray diffractometer equipped with an X'celerator detector, using Cu K $\alpha$  radiation, between  $2\theta=15^\circ$  and  $75^\circ$  with a step size of  $0.01^\circ$ . The refinement of the XRD pattern was done using RIQAS (Materials Data, Inc., Livermore, CA). Scanning electron microscopy (SEM) images were obtained using a JSM-7500F instrument (JEOL Ltd) equipped with a Thermo Scientific Inc. energy dispersive X-ray spectroscopy (EDS) detector used for the elemental mapping. High-resolution transmission electron microscopy (HR-TEM) images were collected with a 200 kV COI monochromated F20 UT Tecnai microscope. Thermogravimetric analysis (TGA) was performed using an SDT-Q600 analyzer (TA Instruments Inc.). HydroQuebec Ltd. (Montreal, Canada) supplied the pure (carbon-free)  $\text{LiCoPO}_4$  used for TGA calibration. Brunauer-Emmett-Teller (BET) measurements were carried out on a Tristar 3000 surface area & porosity analyzer (Micromeritics Instrument Corp.).

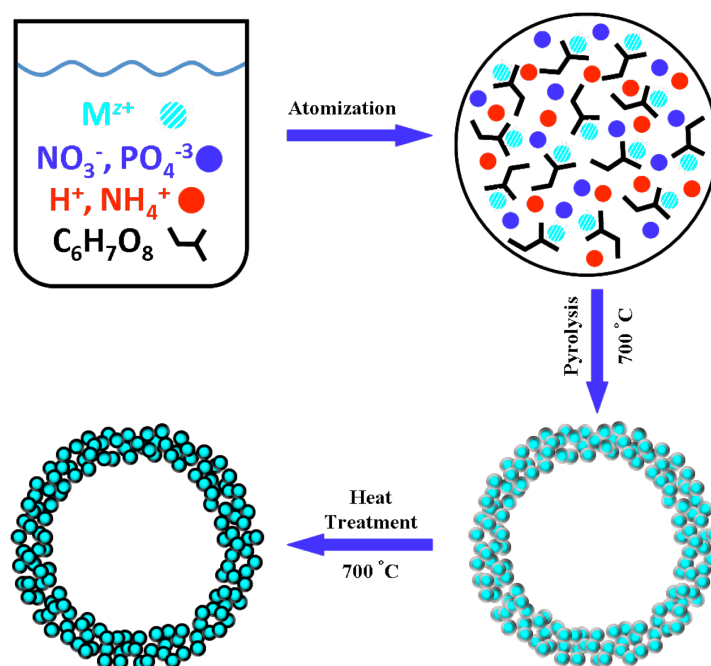

**Fig. S1** Scheme showing the spray pyrolysis preparation of  $\text{LiCoPO}_4/\text{C}$  composites. The aqueous precursor solution is sprayed into a hot furnace. The porous spherical particles are then calcined at  $700^\circ\text{C}$ .

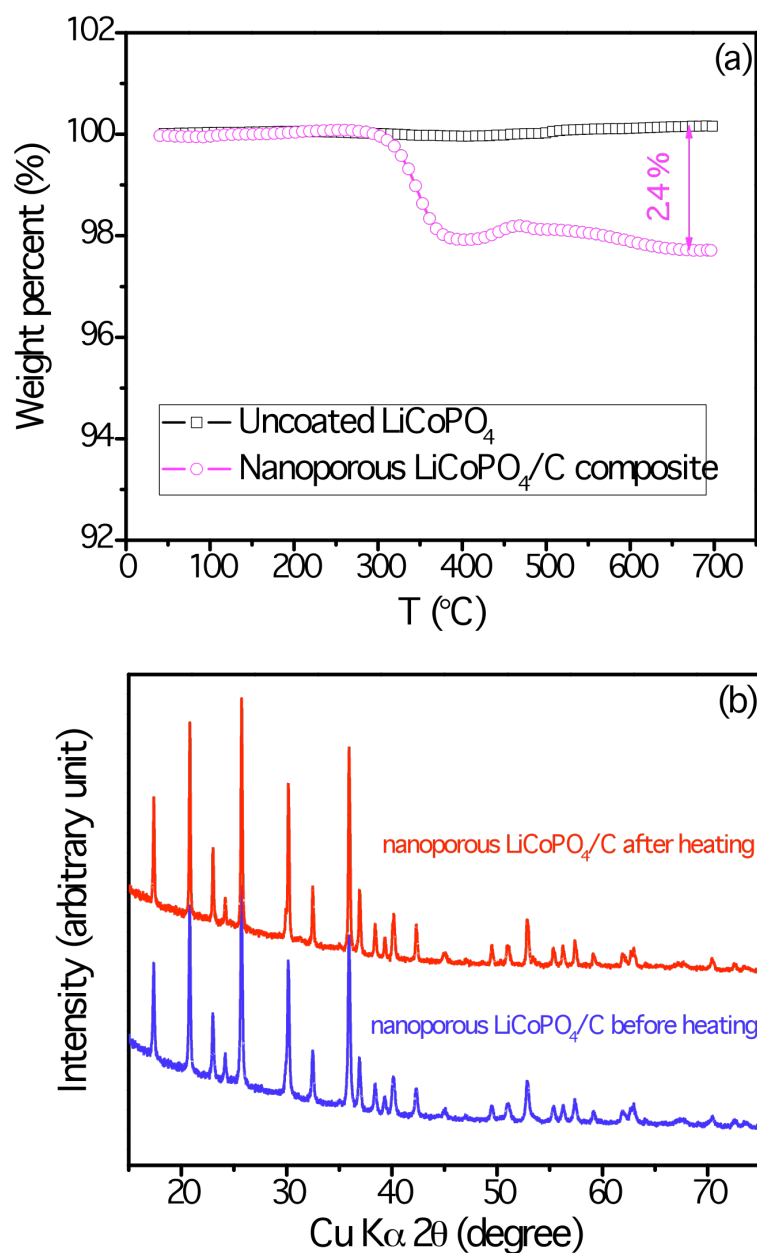

**Fig. S2** (a) TGA curves for the nanoporous LiCoPO<sub>4</sub>/C composite material and uncoated LiCoPO<sub>4</sub> heated in air; (b) XRD patterns of the material before and after heating.

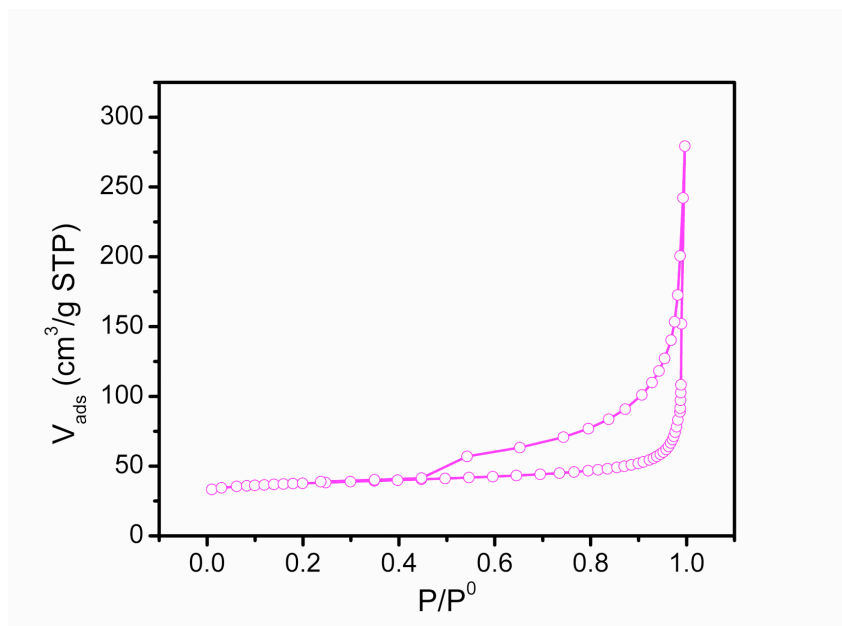

**Fig. S3** Nitrogen adsorption/desorption isotherms for the nanoporous LiCoPO<sub>4</sub>/C composite material.

## Notes

<sup>s</sup> <sup>§</sup> Jun Liu and Thomas E. Conry contributed equally to this work.

<sup>a</sup> Environmental Energy Technologies Division, Lawrence Berkeley National Laboratory, 1 Cyclotron Rd., Berkeley, CA, USA 94720; E-mail: [MMDoeff@lbl.gov](mailto:MMDoeff@lbl.gov) (M.M.D.); [TJRRichardson@lbl.gov](mailto:TJRRichardson@lbl.gov) (T.J.R.).
